# Supplementary material for: Exploring the electrochemical performance of copper-doped cobalt–manganese phosphates for potential supercapattery applications
Source: Royal Society of Chemistry journal article supplement (doi:10.1039/d0ra09952j), 2021-01-01
Supplement: d0ra09952j1.pdf [file d0ra09952j1.pdf]

## Exploring the electrochemical performance of Copper Doped Cobalt- Manganese Phosphates for potential supercapattery applications

Muhammad Zahir Iqbal\*<sup>a</sup>, Saman Siddique<sup>a</sup>, Junaid khan<sup>a</sup>, Shahid Alam<sup>a</sup>, Ayesha Gul<sup>b</sup>

<sup>a</sup>Nanotechnology Research Laboratory, Faculty of Engineering Sciences, GIK Institute of Engineering Sciences and Technology, Topi 23640, Khyber Pakhtunkhwa, Pakistan

<sup>b</sup>NanoCAT Research Center, Institute of Advanced Studies, University of Malaya, Kuala Lumpur, Malaysia.

Email: [zahir.upc@gmail.com](mailto:zahir.upc@gmail.com)

The named assigned to the sonochemically synthesized samples with respect to their composition are tabulated in **Table S1**.

**Table S1:** Different samples along with their respective concentration.

| Concentration                                             | Sample Names |
|-----------------------------------------------------------|--------------|
| <b>Cu<sub>0.50</sub>Mn<sub>0.50</sub>PO<sub>4</sub></b>   | S1           |
| <b>Co<sub>0.75</sub>Cu<sub>0.25</sub>MnPO<sub>4</sub></b> | S2           |
| <b>Co<sub>0.50</sub>Cu<sub>0.50</sub>MnPO<sub>4</sub></b> | S3           |
| <b>Co<sub>0.25</sub>Cu<sub>0.75</sub>MnPO<sub>4</sub></b> | S4           |
| <b>Co<sub>0.50</sub>Mn<sub>0.50</sub>PO<sub>4</sub></b>   | S5           |

The maximum specific capacity delivered by all the prepared electrodes comprising of synthesized active materials in three cell configurations is demonstrated in Fig. S1 which reveals the dominant performance of S3.

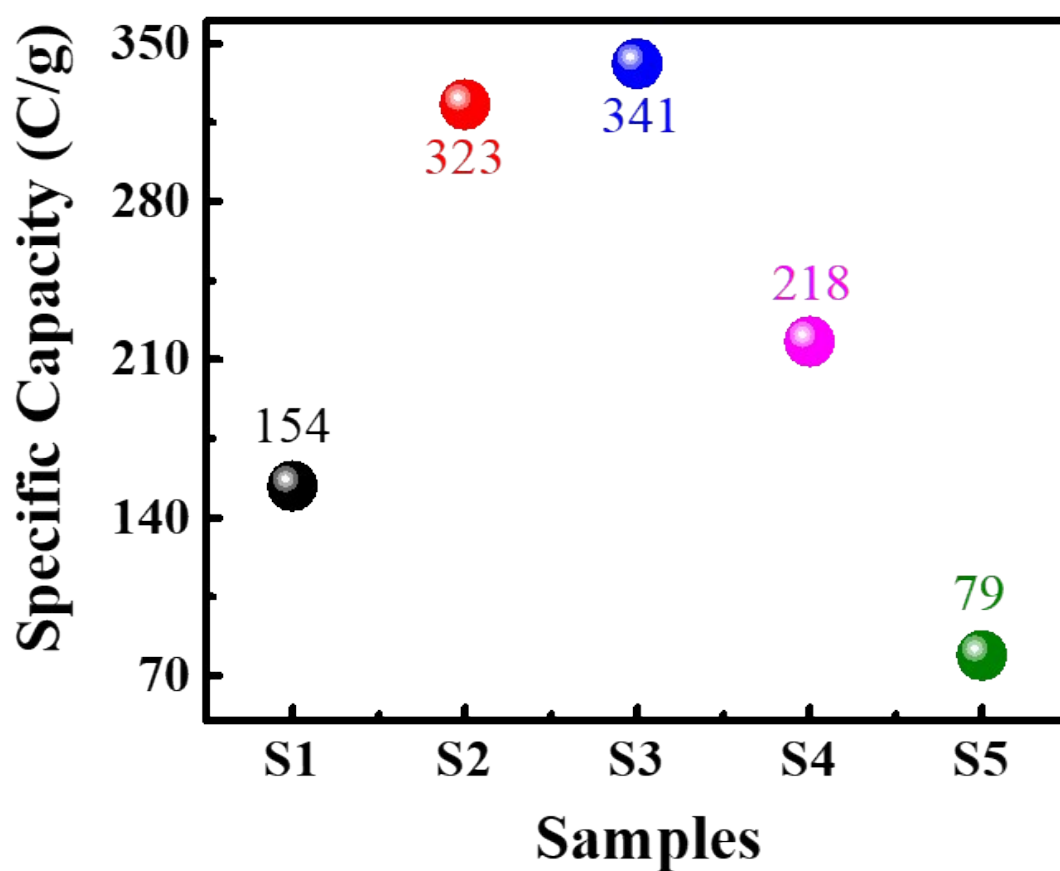

Figure S1: Comparison plot of maximum specific capacity for all the samples.

The equivalent series resistance observed via the real axis intercept of EIS spectrum for all the prepared electrodes in three cell configurations is displayed in Fig. S2 which reveals the optimum conductive nature of S3.

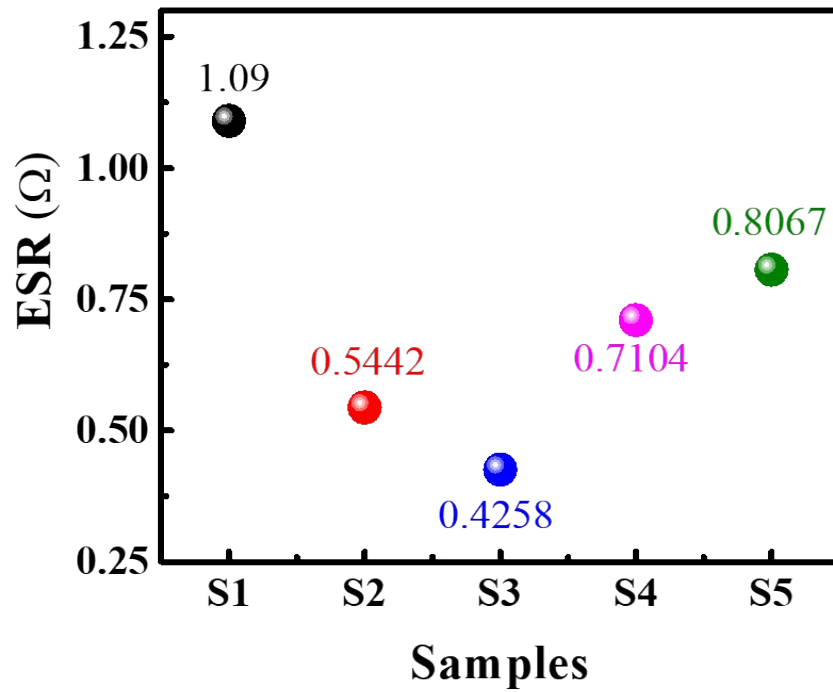

Figure S2: Respective ESR values of all samples

The supercapattery performance was further investigated via b-value fitting. The device reveals the b-values ranging from 0.59 to 0.64 which evinces its hybrid nature.

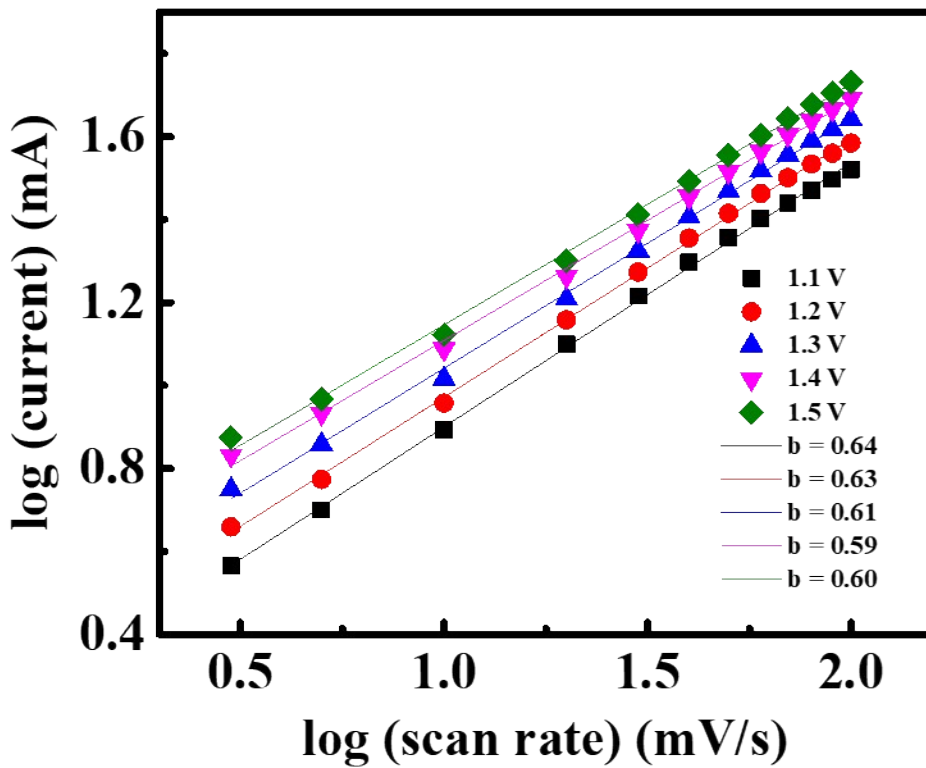

Figure S3: b-value fitting of real device.
